# Supplementary material for: Nanocapsules of ZnO Nanorods and Geraniol as a Novel Mean for the Effective Control of Botrytis cinerea in Tomato and Cucumber Plants
Source: MDPI journal article supplement (doi:10.3390/plants12051074), 2023-02-28
Supplement: s1 [file s1]

## Article

# Nanocapsules of ZnO Nanorods and Geraniol as a Novel Means for the Effective Control of *Botrytis cinerea* in Tomato and Cucumber Plants

Panagiota Tryfon <sup>1</sup>, Nathalie N. Kamou <sup>2</sup>, Akrivi Pavlou <sup>1</sup>, Stefanos Mourdikoudis <sup>3,4</sup>, Urania Menkissoglu-Spiroudi <sup>2,\*</sup> and Catherine Dendrinou-Samara <sup>1,\*</sup>

<sup>1</sup> Laboratory of Inorganic Chemistry, Department of Chemistry, Aristotle University of Thessaloniki, 54124 Thessaloniki, Greece; tryfon.giota@gmail.com (P.T.); akrivipavlou@gmail.com (A.P.)

<sup>2</sup> Pesticide Science Laboratory, School of Agriculture, Faculty of Agriculture Forestry and Natural Environment, Aristotle University of Thessaloniki, 54124 Thessaloniki, Greece; nnkamou@gmail.com

<sup>3</sup> Biophysics Group, Department of Physics and Astronomy, University College London, London WC1E 6BT, UK; s.mourdikoudis@ucl.ac.uk

<sup>4</sup> UCL Healthcare Biomagnetics and Nanomaterials Laboratories, 21 Albemarle Street, London W1S 4BS, UK

\* Correspondence: rmenkis@agro.auth.gr (U.M.-S.); samkat@chem.auth.gr (C.D.-S.)

**Table S1.** Values for d-spacing (Å) and diffraction angles (2θ) of the highest intensity reflections for identified phases are present in the analysis separately.

| 2 Theta (degrees) | d-spacing group (Å) |
|-------------------|---------------------|
| 31.66             | 2.82                |
| 34.36             | 2.61                |
| 36.17             | 2.48                |

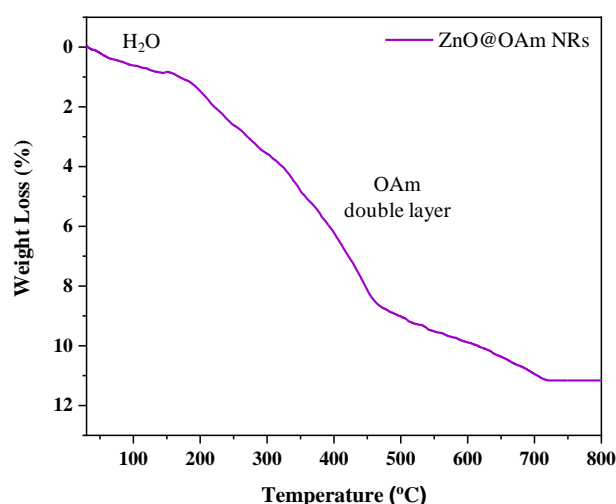

**Figure S1.** TGA curve for the decomposition of the synthesized ZnO@OAm NRs at the temperature ranges 30–800 °C.

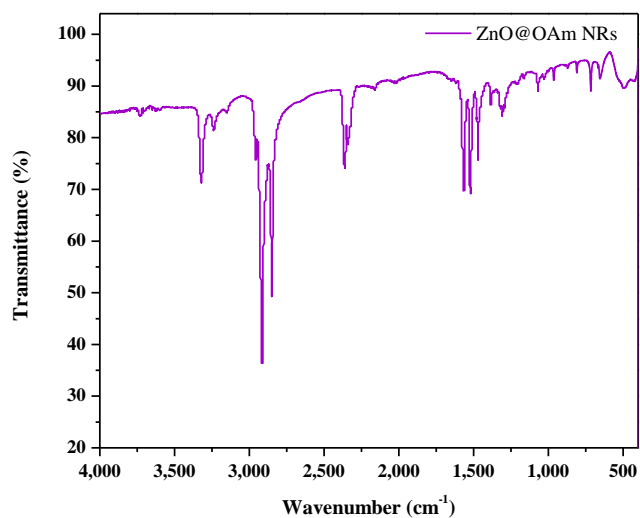

**Figure S2.** FT-IR spectrum of the ZnO@OAm NRs in the 4,000–450  $\text{cm}^{-1}$  region.

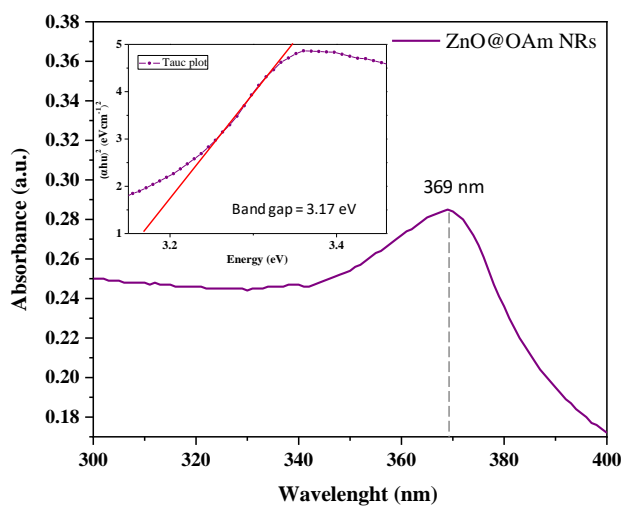

**Figure S3.** UV-Vis absorption spectrum of the ZnO@OAm NRs with Tauc plots (inset) obtained through standard equations in NPs indicates a band gap of 3.17 eV (B).

**Table S2.** Pharmacokinetic values ( $R^2$ ,  $K_H$ ,  $N$ ) for ZnOGer1 NCs and ZnOGer2 NCs are derived from zero-order, first-order, Higuchi, and Korsmeyer-Peppas models. (D). The analyses were performed in triplicate. Adjusted R-squared values are also included.

| Nanocapsules      | Zero-order | First order | Higuchi |       | Korsmeyer-Peppas |       |
|-------------------|------------|-------------|---------|-------|------------------|-------|
|                   | $R^2$      | $R^2$       | $R^2$   | $K_H$ | $R^2$            | $N$   |
| ZnOGer1 NCs 25 °C | 0.7388     | 0.9257      | 0.9800  | 9.42  | 0.9276           | 0.530 |
| ZnOGer2 NCs 25 °C | 0.8589     | 0.9103      | 0.9866  | 13.20 | 0.8689           | 0.488 |
| ZnOGer1 NCs 35 °C | 0.8776     | 0.9189      | 0.9841  | 11.32 | 0.8475           | 0.516 |

|                   |        |        |        |       |        |       |
|-------------------|--------|--------|--------|-------|--------|-------|
| ZnOGer2 NCs 35 °C | 0.8957 | 0.8141 | 0.9741 | 14.52 | 0.9274 | 0.355 |
|-------------------|--------|--------|--------|-------|--------|-------|

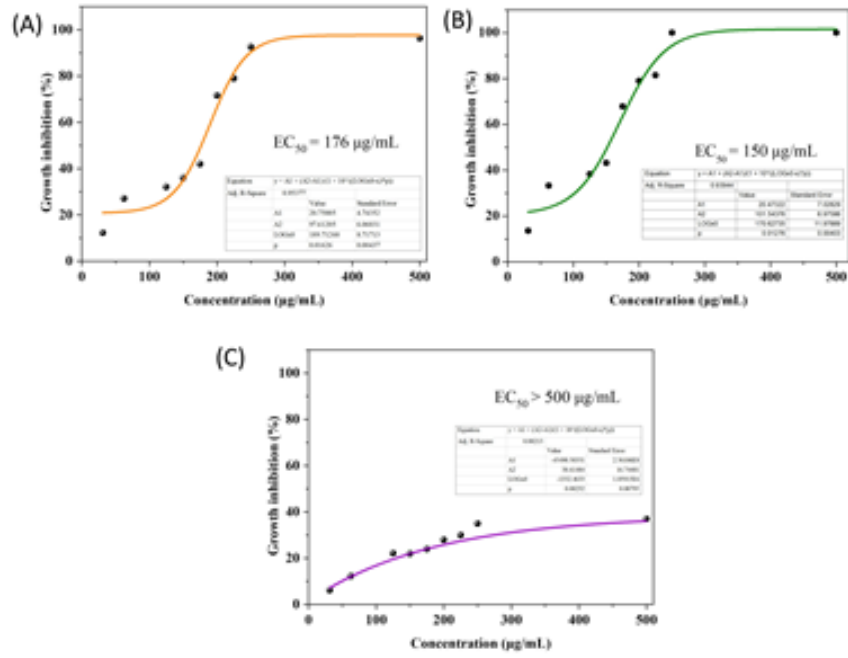

**Figure S4.** Dose-response growth inhibition curves of *B. cinerea* exposed to nine (9) different concentrations of ZnOGer1 NCs (EC<sub>50</sub> = 176 µg/mL) (A), ZnOGer2 NCs (EC<sub>50</sub> = 150 µg/mL) (B), and ZnO NCs (EC<sub>50</sub> > 500 µg/mL) (C). Each point represents the mean of ten replicates per NCs concentration (two experiments, five replications).
